# Supplementary material for: Effects of gabapentin on slow-wave sleep period in critically ill adult patients: a randomized controlled trial
Source: Research Square preprint supplement (doi:10.21203/rs.3.rs-2586319/v1), 2023-02-22
Supplement: Supplementary file 1 [file 99bdbdf13a53bdc046580a0e.docx]

Supplement 1 Concomitant drugs

|  | Gabapentin | Control | P-value |
| --- | --- | --- | --- |
| Sedative drugs | | | |
| ·      Fentanyl | 20 (66.67) | 21 (70.00) | 0.781 |
| o   Dose (mcg/h) | 51.12 ± 19.30 | 46.10 ± 16.01 | 0.369 |
| o   Duration (day) | 3.30 ± 1.38 | 3.48 ± 1.37 | 0.683 |
| ·      Dexmedetomidine | 3 (10.00) | 2 (6.67) | <0.99 |
| o   Dose (mcg/h) | 12.97 ± 2.68 | 16.00 ± 0.00 | 0.227 |
| o   Duration (day) | 3.33 ± 1.53 | 2.50 ± 2.12 | 0.638 |
| ·      Midazolam | 5 (16.67) | 3 (10.00) | 0.706 |
| o   Dose (mcg/h) | 3.94 ± 1.40 | 3.99 ± 1.18 | 0.960 |
| o   Duration (day) | 3.20 ± 1.10 | 3.33 ± 0.58 | 0.855 |
| Antipsychotic drugs | | | |
| ·      Quetiapine | 6 (20.00) | 6 (20.00) | <0.99 |
| o   Dose (mg/day) | 23.06 ± 7.20 | 17.01 ± 8.38 | 0.210 |
| o   Duration (day) | 3.17 ± 1.84 | 2.50 ± 1.51 | 0.508 |
| ·      Risperidone | 1 (3.33) | 1 (3.33) | <0.99 |
| o   Dose (mg/day) | 0.50 | 0.60 |  |
| o   Duration (day) | 1 | 5 |  |
| ·      Haloperidol | 0 | 0 |  |
| o   Dose (mg/day) | 0 | 0 |  |
| o   Duration (day) | 0 | 0 |  |

Values are presented as mean ± SD or n (%)
